# Supplementary material for: Oxidative DNA damage stalls the human mitochondrial replisome
Source: PubMed Central journal article supplement (PMC4929447; doi:10.1038/srep28942), 2016-07-01
Supplement: srep28942-s1.pdf [file srep28942-s1.pdf]

## Supplemental information

### Oxidative DNA damage stalls the human mitochondrial replisome

**Gorazd Stojkovič<sup>1,4</sup>, Alena V. Makarova<sup>2,3,4</sup>, Paulina H. Wanrooij<sup>1,2</sup>, Josefin Forslund<sup>1</sup>, Peter M. Burgers<sup>2</sup> and Sjoerd Wanrooij<sup>1,2\*</sup>**

1. Department of Medical Biochemistry and Biophysics, Umeå University, Umeå, Sweden.
2. Department of Biochemistry and Molecular Biophysics, Washington University School of Medicine, St. Louis, MO 63110, USA.
3. Institute of Molecular Genetics, Russian Academy of Sciences, Moscow 123182, Russia.
4. These authors contributed equally to this work.

\* Correspondence [Sjoerd.Wanrooij@umu.se](mailto:Sjoerd.Wanrooij@umu.se)

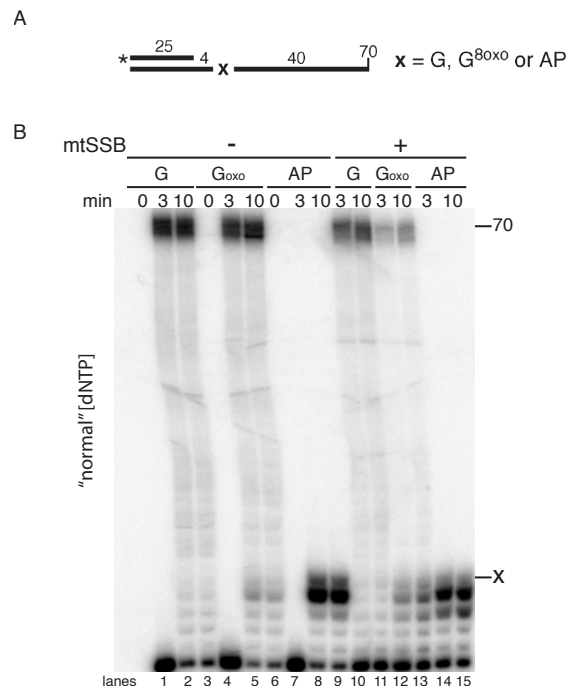

**Supplemental Figure 1.** Accompanies figure 1. DNA pol  $\gamma$  translesion synthesis on oxidative DNA damage at “normal” dNTP concentrations. A) Schematic diagram of the oligonucleotide substrate. The template is a 70-mer. At the +5 position (indicated as ‘x’) is either a dGTP (G), 8-oxo-G (G<sup>8oxo</sup>) or an abasic site (AP). MtSSB (70 nM) was added where indicated. B) Ten percent dPAGE of a time course reaction with exonuclease proficient Pol  $\gamma$ A (12,5 nM) and Pol  $\gamma$ B (18,75 nM) on undamaged (lane 1-3, 10-11), 8-oxo-G (lane 4-6, 12-13) or abasic site (lane 7-9, 14-15) -containing DNA template. This experiment is identical to the reactions shown in Figure 1B (lanes 1-15), but is included in order to demonstrate that the DNA products marked with an asterisk "\*" in Figure 1B (lanes 7-8) are the result of carry-over from lane 6, as they are not present in this image.

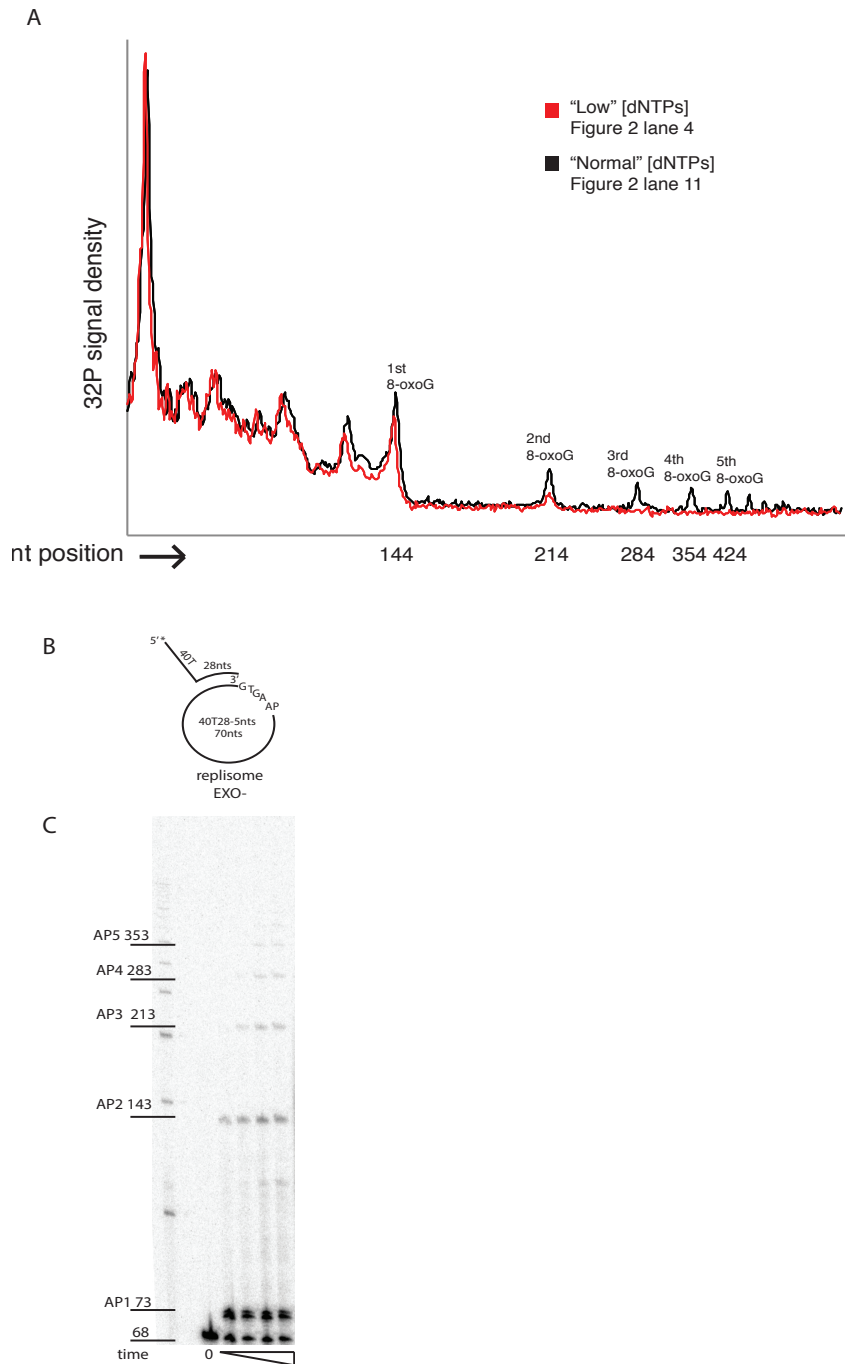

**Supplemental Figure 2.** Accompanies Figure 2. A) At "normal" dNTP concentrations the mtDNA replication fork is able to produce longer DNA fragments on an 8-oxoG template compared to reaction at "low" dNTP concentrations. A distribution plot of the  $^{32}\text{P}$  signal density from Figure 2, lane 4 ("low" dNTPs; red) and Figure 2 lane 11 ("normal" dNTPs; black). The first 5 encounters of 8-oxoG are indicated. The distribution of the  $^{32}\text{P}$  signal was analysed for each lane using Image J software. B) Abasic site (AP) DNA substrate used in section C. DNA substrate with 68 nts primer (5'  $^{32}\text{P}$  (\*) radiolabeled) annealed to a 70-mer AP minicircle template. This generated a DNA substrate that has a 40 nts 5' overhang and a 28 nts dsDNA region with an AP site at the +5 position (from the primer 3' end). C) The exonuclease activity of Pol  $\gamma$ A ensures the mtDNA replisome cannot synthesize past an abasic site. DNA replication was done on the minicircle template shown in B. Six percent dPAGE gel of replication time course (0, 10, 30, 60, 90 min) shows that the proofreading deficient mtDNA replisome is capable of limited bypass of abasic sites. The first 5 encounters of the abasic site are indicated (AP1-AP5) and marked with the length of the DNA product.

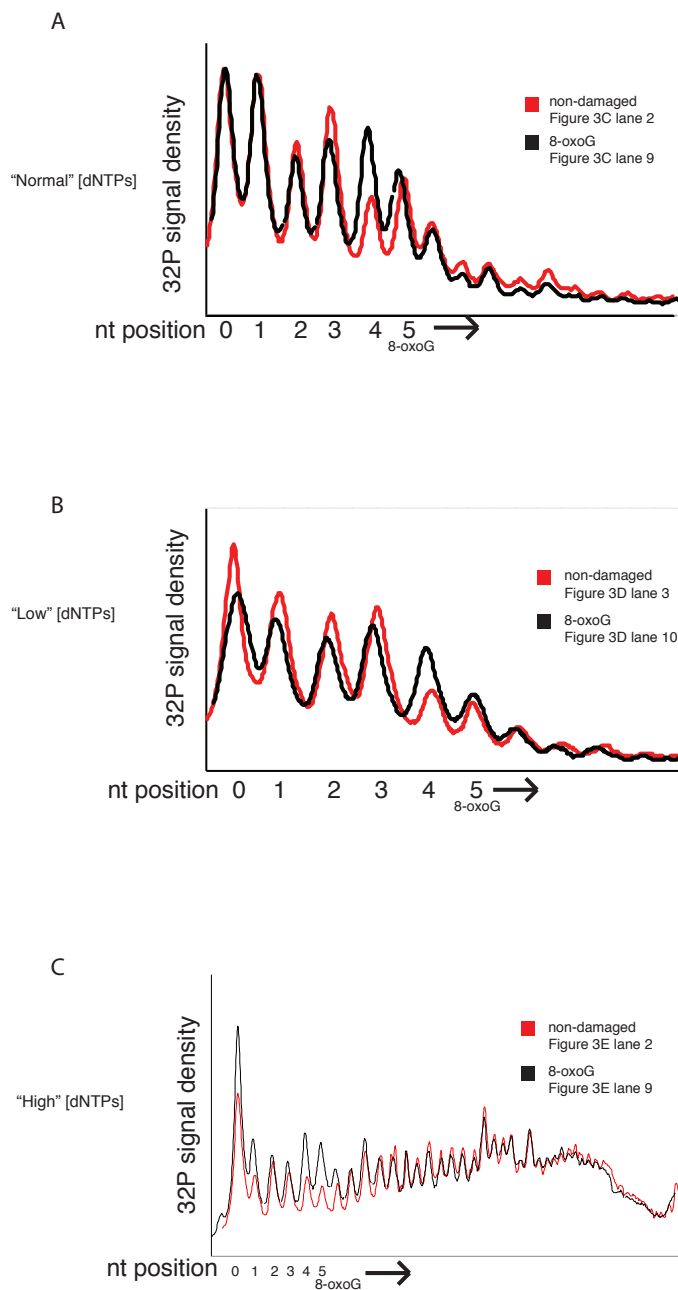

**Supplemental Figure 3.** Accompanies Figure 3. PrimPol shows modest stalling of DNA synthesis at nt +4, one nt before the 8-oxoG lesion, regardless of dNTP concentrations. Distribution plots of  $^{32}\text{P}$  signal density over the indicated lanes in primer extension experiments with PrimPol. A) Figure 3C lane 2 (non-damaged template; red) and lane 9 (8-oxo-G template; black). B) Figure 3D lane 3 (non-damaged template; red) and lane 10 (8-oxo-G template; black). C) Figure 3E lane 2 (non-damaged template; red) and lane 9 (8-oxo-G template; black). The distribution of the  $^{32}\text{P}$  signal over each lane was analysed using Image J software.

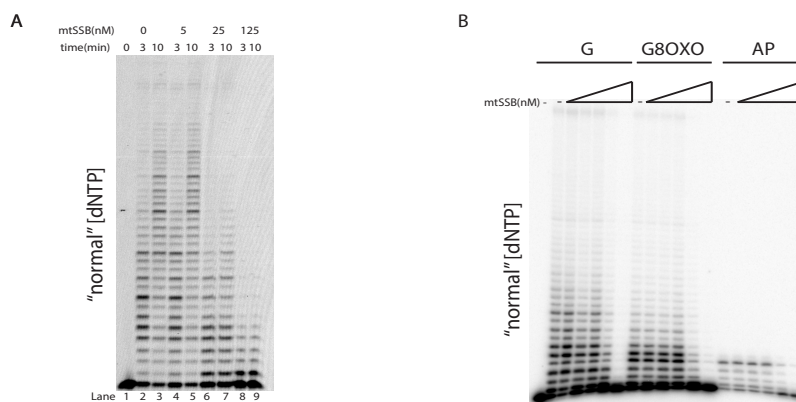

**Supplemental Figure 4.** MtSSB inhibits PrimPol DNA synthesis on undamaged and oxidatively damaged DNA. A) High concentrations of mtSSB block DNA synthesis by PrimPol. Eleven percent dPAGE separation of a time course replication reaction with 200 nM of PrimPol in the presence “normal” dNTP levels and the indicated amount of tetramer mtSSB. B) dPAGE gel of PrimPol (200 nM) DNA synthesis reaction performed as described in the material and methods with 0, 5, 10 20 125 or 250 nM mtSSB in the presence of “normal” dNTP concentrations on an undamaged, 8-oxo-G or abasic site containing DNA template (as shown in Figure 1A).

**Supplemental Table 1A, accompanies Figure 1B. Quantification of signal at damage site (nt positions +3, +4, +5) in reactions with wt Pol  $\gamma$ .**

| [dNTP] | mtSSB | Template          | Signal at +3, +4 and +5 (%) | Lane |
|--------|-------|-------------------|-----------------------------|------|
| Normal | -     | G                 | 2                           | 2    |
| Normal | -     | G <sup>8oxo</sup> | 8                           | 5    |
| Normal | -     | AP                | 77                          | 8    |
| Normal | +     | G                 | 6                           | 10   |
| Normal | +     | G <sup>8oxo</sup> | 21                          | 12   |
| Normal | +     | AP                | 73                          | 14   |
| Low    | -     | G                 | 3                           | 17   |
| Low    | -     | G <sup>8oxo</sup> | 24                          | 19   |
| Low    | -     | AP                | 76                          | 21   |
| Low    | +     | G                 | 3                           | 23   |
| Low    | +     | G <sup>8oxo</sup> | 27                          | 25   |
| Low    | +     | AP                | 78                          | 27   |

The <sup>32</sup>P signal densities at nt positions +3, +4 and +5 of the 3 minute timepoints from Figure 1B were divided by the signal density of the input primer (lanes 1, 4 and 7 for non-damaged, 8-oxo-G and abasic site templates, respectively). Reactions were performed with the wild-type Pol  $\gamma$  (AB<sub>2</sub>).

**Supplemental Table 1B, accompanies Figure 1C. Quantification of signal at damage site (nt positions +3, +4, +5) in reactions with exonuclease-deficient Pol  $\gamma$ .**

| [dNTP] | mtSSB | Template          | Signal at +3, +4 and +5 (%) | Lane |
|--------|-------|-------------------|-----------------------------|------|
| Normal | -     | G                 | 2                           | 2    |
| Normal | -     | G <sup>8oxo</sup> | 5                           | 5    |
| Normal | -     | AP                | 63                          | 8    |
| Normal | +     | G                 | 2                           | 10   |
| Normal | +     | G <sup>8oxo</sup> | 9                           | 12   |
| Normal | +     | AP                | 104                         | 14   |
| Low    | -     | G                 | 2                           | 17   |
| Low    | -     | G <sup>8oxo</sup> | 11                          | 19   |
| Low    | -     | AP                | 73                          | 21   |
| Low    | +     | G                 | 2                           | 23   |
| Low    | +     | G <sup>8oxo</sup> | 15                          | 25   |
| Low    | +     | AP                | 94                          | 27   |

The <sup>32</sup>P signal densities at nt positions +3, +4 and +5 of the 3 minute timepoints from Figure 1B were divided by the signal density of the input primer (lanes 1, 4 and 7 for non-damaged, 8-oxo-G and abasic site templates, respectively). Reactions were performed with the exonuclease-deficient Pol  $\gamma$  (AB<sub>2</sub>).

**Supplemental Table 2A, accompanies Figure 3C. Quantification of full-length product at "normal" dNTP concentrations.**

| Template          | Time (min) | PrimPol | Pol $\gamma$ (AB) <sub>2</sub> | Full-length product (%) | Lane |
|-------------------|------------|---------|--------------------------------|-------------------------|------|
| G                 | 3          | -       | +                              | 55                      | 4    |
| G                 | 10         | -       | +                              | 70                      | 5    |
| G                 | 3          | +       | +                              | 45                      | 6    |
| G                 | 10         | +       | +                              | 81                      | 7    |
| G <sup>8oxo</sup> | 3          | -       | +                              | 45                      | 11   |
| G <sup>8oxo</sup> | 10         | -       | +                              | 63                      | 12   |
| G <sup>8oxo</sup> | 3          | +       | +                              | 39                      | 13   |
| G <sup>8oxo</sup> | 10         | +       | +                              | 73                      | 14   |

<sup>32</sup>P signal densities from nt positions +67 to +70 relative to the signal of the input primer in a control reaction without added protein (lanes 1 and 8 for non-damaged and 8-oxo-G templates, respectively).

**Supplemental Table 2B, accompanies Figure 3D. Quantification of full-length product at low dNTP concentrations.**

| Template          | Time (min) | PrimPol | Pol $\gamma$ (AB) <sub>2</sub> | Full-length product (%) | Lane |
|-------------------|------------|---------|--------------------------------|-------------------------|------|
| G                 | 3          | -       | +                              | 39                      | 4    |
| G                 | 10         | -       | +                              | 37                      | 5    |
| G                 | 3          | +       | +                              | 39                      | 6    |
| G                 | 10         | +       | +                              | 64                      | 7    |
| G <sup>8oxo</sup> | 3          | -       | +                              | 22                      | 11   |
| G <sup>8oxo</sup> | 10         | -       | +                              | 19                      | 12   |
| G <sup>8oxo</sup> | 3          | +       | +                              | 25                      | 13   |
| G <sup>8oxo</sup> | 10         | +       | +                              | 45                      | 14   |

<sup>32</sup>P signal densities from nt positions +67 to +70 relative to the signal of the input primer in a control reaction without added protein (lanes 1 and 8 for non-damaged and 8-oxo-G templates, respectively).

**Supplemental Table 2C, accompanies Figure 3E. Quantification of full-length product at high dNTP concentrations.**

| Template          | Time (min) | PrimPol | Pol $\gamma$ (AB) <sub>2</sub> | Full-length product (%) | Lane |
|-------------------|------------|---------|--------------------------------|-------------------------|------|
| G                 | 3          | -       | +                              | 65                      | 4    |
| G                 | 10         | -       | +                              | 74                      | 5    |
| G                 | 3          | +       | +                              | 56                      | 6    |
| G                 | 10         | +       | +                              | 84                      | 7    |
| G <sup>8oxo</sup> | 3          | -       | +                              | 60                      | 11   |
| G <sup>8oxo</sup> | 10         | -       | +                              | 70                      | 12   |
| G <sup>8oxo</sup> | 3          | +       | +                              | 43                      | 13   |
| G <sup>8oxo</sup> | 10         | +       | +                              | 80                      | 14   |

<sup>32</sup>P signal densities from nt positions +67 to +70 relative to the signal of the input primer in a control reaction without added protein (lanes 1 and 8 for non-damaged and 8-oxo-G templates, respectively).

**Supplemental Table 2D, accompanies Figure 3E. Quantification of signal at 8-oxo-G site at high dNTP concentrations.**

| Template          | PrimPol | Pol $\gamma$ (AB) <sub>2</sub> | +3, +4 and +5 (%) | Lane |
|-------------------|---------|--------------------------------|-------------------|------|
| G                 | -       | +                              | 1.2               | 4    |
| G                 | +       | +                              | 2.7               | 6    |
| G <sup>8oxo</sup> | -       | +                              | 3.5               | 11   |
| G <sup>8oxo</sup> | +       | +                              | 3.7               | 13   |

<sup>32</sup>P signal densities from nt positions +3, +4 and +5 relative to the signal of the input primer in a control reaction without added protein (lanes 1 and 8 for non-damaged and 8-oxo-G templates, respectively).



**Supplemental Table 3, accompanies Figure 5.** The percentage of bypass products relative to all products, per lane.

| dNTPs    | Template          | PrimPol | % bypass products | Figure, lane # |
|----------|-------------------|---------|-------------------|----------------|
| Low      | G                 | -       | 22                | 5B, 1          |
| Low      | G                 | +       | 13                | 5B, 3          |
| Low      | G <sup>8oxo</sup> | -       | 2                 | 5B, 4          |
| Low      | G <sup>8oxo</sup> | +       | 1                 | 5B, 6          |
| Low      | AP                | -       | 0                 | 5B, 7          |
| Low      | AP                | +       | 0                 | 5B, 9          |
| "Normal" | G                 | -       | 19                | 5C, 1          |
| "Normal" | G                 | +       | 15                | 5C, 3          |
| "Normal" | G <sup>8oxo</sup> | -       | 7                 | 5C, 4          |
| "Normal" | G <sup>8oxo</sup> | +       | 2                 | 5C, 6          |
| "Normal" | AP                | -       | 0                 | 5C, 7          |
| "Normal" | AP                | +       | 0                 | 5C, 9          |
| High     | G                 | -       | 13                | 5D, 1          |
| High     | G                 | +       | 20                | 5D, 3          |
| High     | G <sup>8oxo</sup> | -       | 13                | 5D, 4          |
| High     | G <sup>8oxo</sup> | +       | 12                | 5D, 6          |
| High     | AP                | -       | 1                 | 5D, 7          |
| High     | AP                | +       | 2                 | 5D, 9          |

The signal of products that had been extended past the first encounter of the damage site (at 144 nt) was divided by the total signal of each lane. Where PrimPol was added, it was present at 200 nM. G, non-damaged; G<sup>8oxo</sup>, 8-oxo-G; AP, abasic site.

**Supplemental Table 4.** Primers and DNA template sequences use in this study.

| Name                 | Description                                       | Sequence (5'-3')                                                                               |
|----------------------|---------------------------------------------------|------------------------------------------------------------------------------------------------|
| 70 ND                | non-damaged template                              | GAGGGGTATGTGATGGGAGGGCTA<br>GGATATGAGGTGAGTTGAGTGGAGT<br>TGGAAGTAGGCATACCCCTAT                 |
| 70 <sup>8oxo</sup> G | <sup>8oxo</sup> G template                        | GAGGGGTATGTGATGGGAGGGCTA<br>GGATATGAGGTGAGTT <sup>8oxo</sup> GAGTGG<br>GTTGGAAGTAGGCATACCCCTAT |
| 70 AP                | abasic site template                              | GAGGGGTATGTGATGGGAGGGCTA<br>GGATATGAGGTGAGTTAPAGTGGAG<br>TTGGAAGTAGGCATACCCCTAT                |
| 28-mer               | for template circularization                      | AGGCATACCCCTATGAGTTGGAAGT<br>AGG                                                               |
| 25-mer               | extension assay primer                            | ATAGGGGTATGCCTACTTCCAACCTC                                                                     |
| 68-mer               | extension assay primer                            | T40CTCATAGGGGTATGCCTACTTCC<br>AACTC                                                            |
| 82-mer               | extension assay primer                            | T40CTCATAGGGGTATGCCTACTTCC<br>AACTCCACTCAACTCACC                                               |
| BIOHindIII           | Biotinylated primer with<br>internal HindIII site | GTAGAAGCTTGATCTACGAGAGTAC<br>TATTAGCTATAGGGGTATGCCTACT<br>TCCAACCTC                            |
| For70ntseq           | PCR forward primer                                | GTAGAAGCTTGATCTACGAGAG                                                                         |
| Rev70ntseq           | PCR reverse primer                                | GAGGGGTATGTGATGGGAGGGCTA<br>GG                                                                 |
| M13 rev (-49)        | Sequencing primer for<br>pUC19                    | GAGCGGATAACAATTCACACAGG                                                                        |
